# Supplementary material for: PARALLEL EVOLUTION OF LOCAL ADAPTATION AND REPRODUCTIVE ISOLATION IN THE FACE OF GENE FLOW
Source: PubMed Central journal article supplement (PMC4261988; doi:10.1111/evo.12329), 2013-12-23

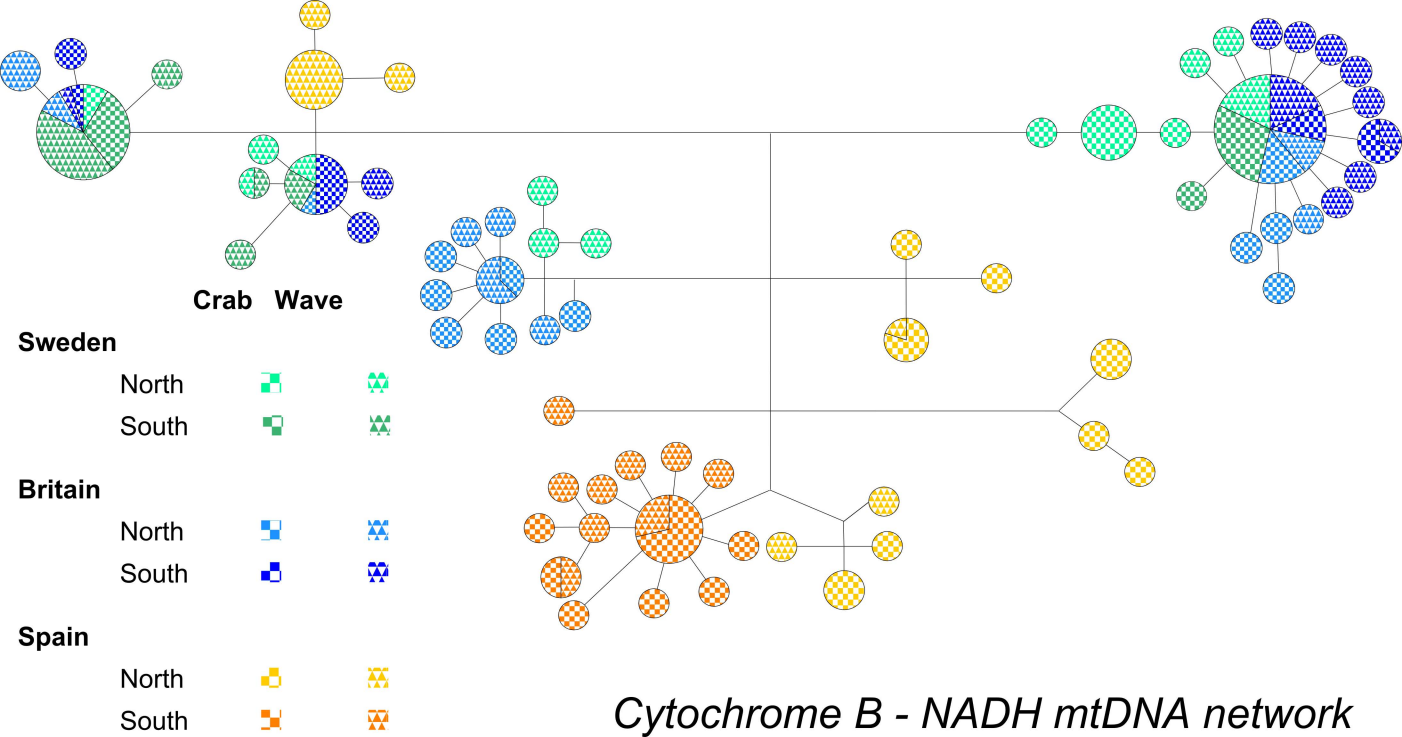

*Cal*

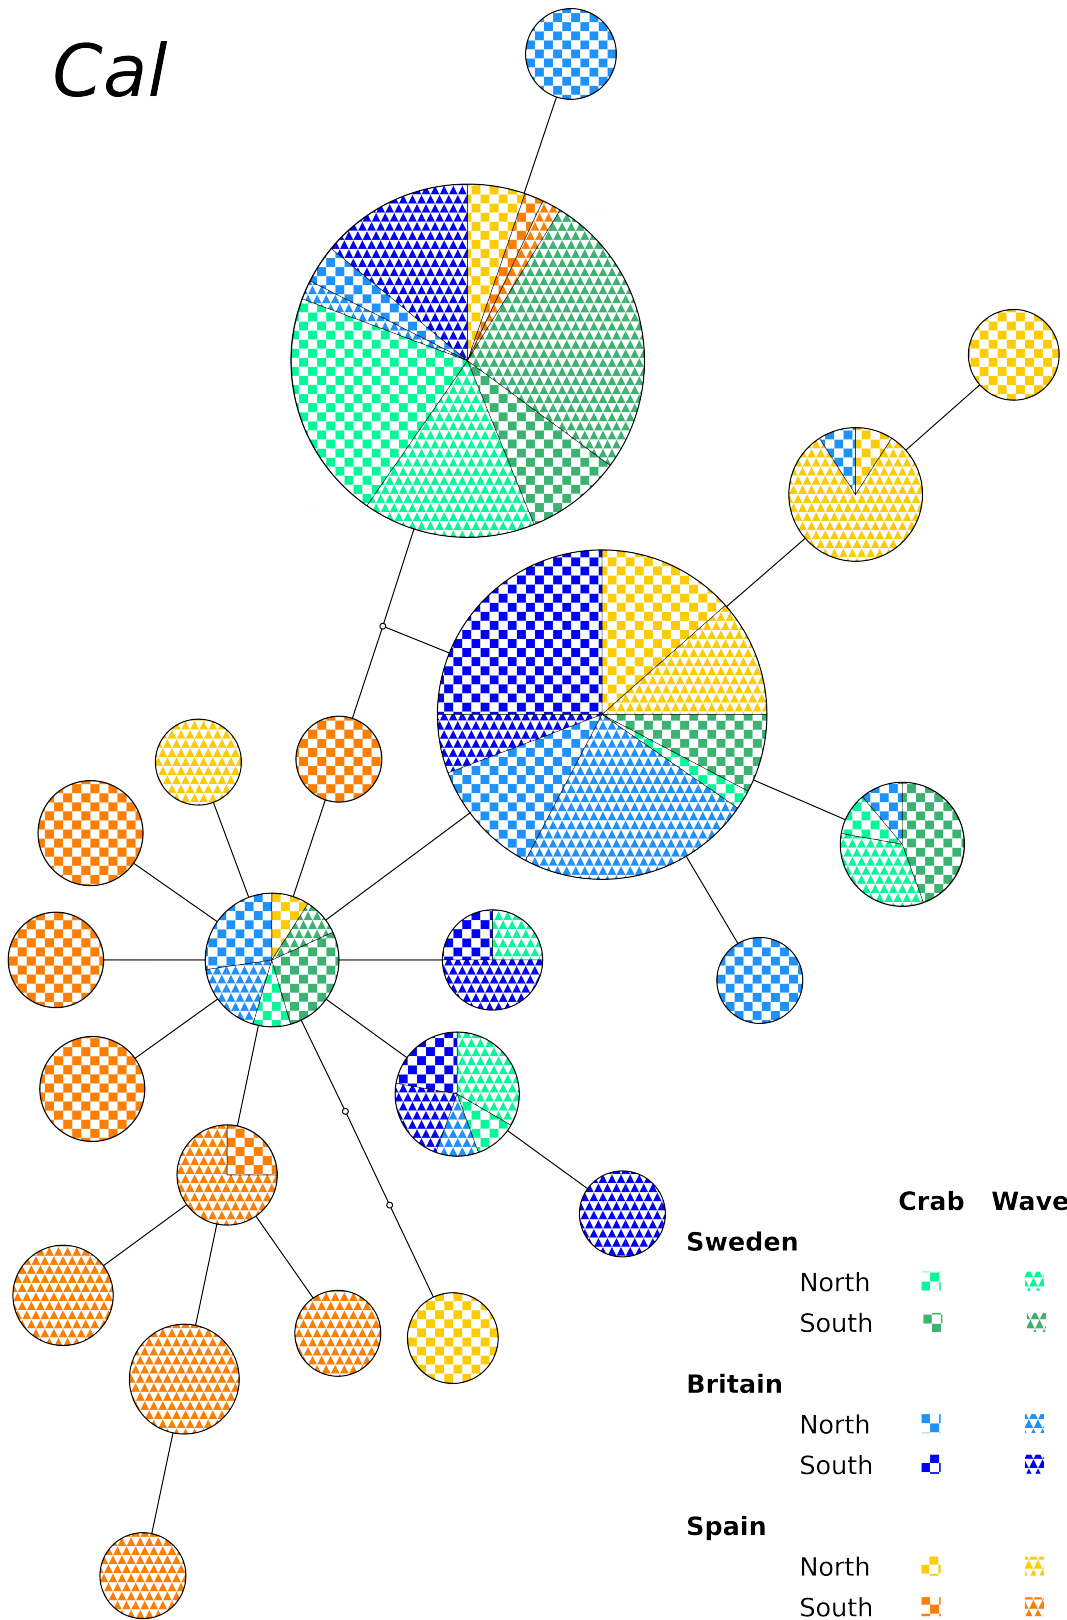

|                | Crab | Wave |
|----------------|------|------|
| <b>Sweden</b>  |      |      |
| North          |      |      |
| South          |      |      |
| <b>Britain</b> |      |      |
| North          |      |      |
| South          |      |      |
| <b>Spain</b>   |      |      |
| North          |      |      |
| South          |      |      |

# ElFac

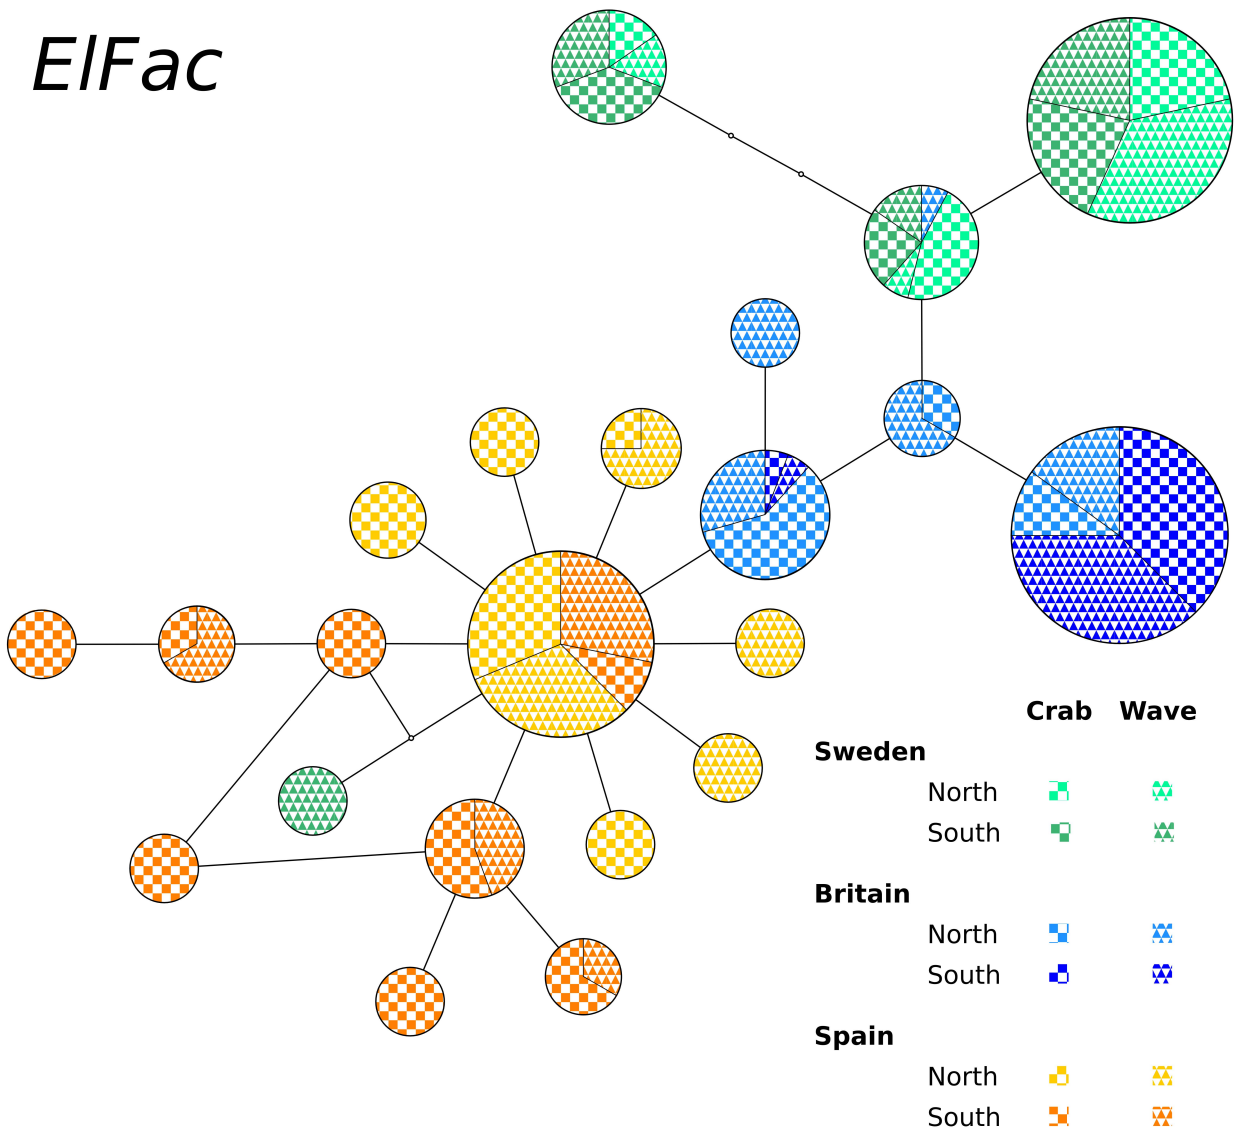

# ThioPer

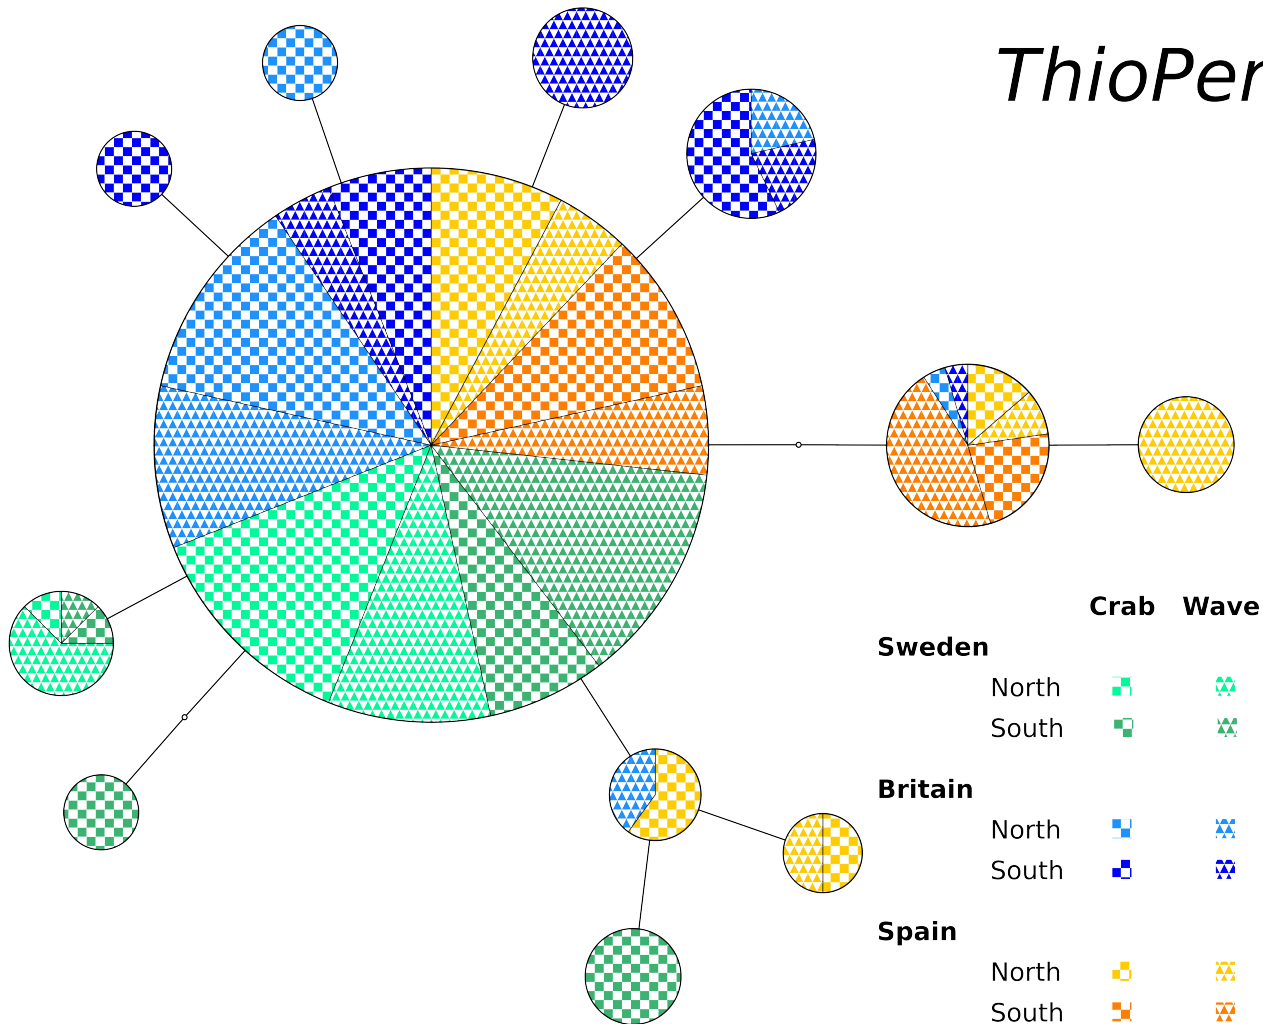

Supplement: evo0068-0935-SD1.pdf [file evo0068-0935-SD1.pdf]
