# Supplementary material for: PARALLEL EVOLUTION OF LOCAL ADAPTATION AND REPRODUCTIVE ISOLATION IN THE FACE OF GENE FLOW
Source: PubMed Central journal article supplement (PMC4261988; doi:10.1111/evo.12329), 2013-12-23

**Figure S3.** Posterior quantile analyses used in model checking.

To validate our parameter estimates, we used the 1000 pseudo-observed data sets that were generated under each model and, using the parameters (drawn from the priors) and the resulting summary statistics as true parameters and pseudo-observed data sets respectively, we looked for potential bias in the posterior distributions (see ABCtoolbox manual, p.48; [http://www.cmpg.iew.unibe.ch/content/software\\_services/computer\\_programs/abctoolbox/index\\_eng.html](http://www.cmpg.iew.unibe.ch/content/software_services/computer_programs/abctoolbox/index_eng.html)). For each parameter of interest, a Kolmogorov-Smirnov test, implemented in R, was used to check for uniformity of the posterior quantiles.

**A. Within-region model:**

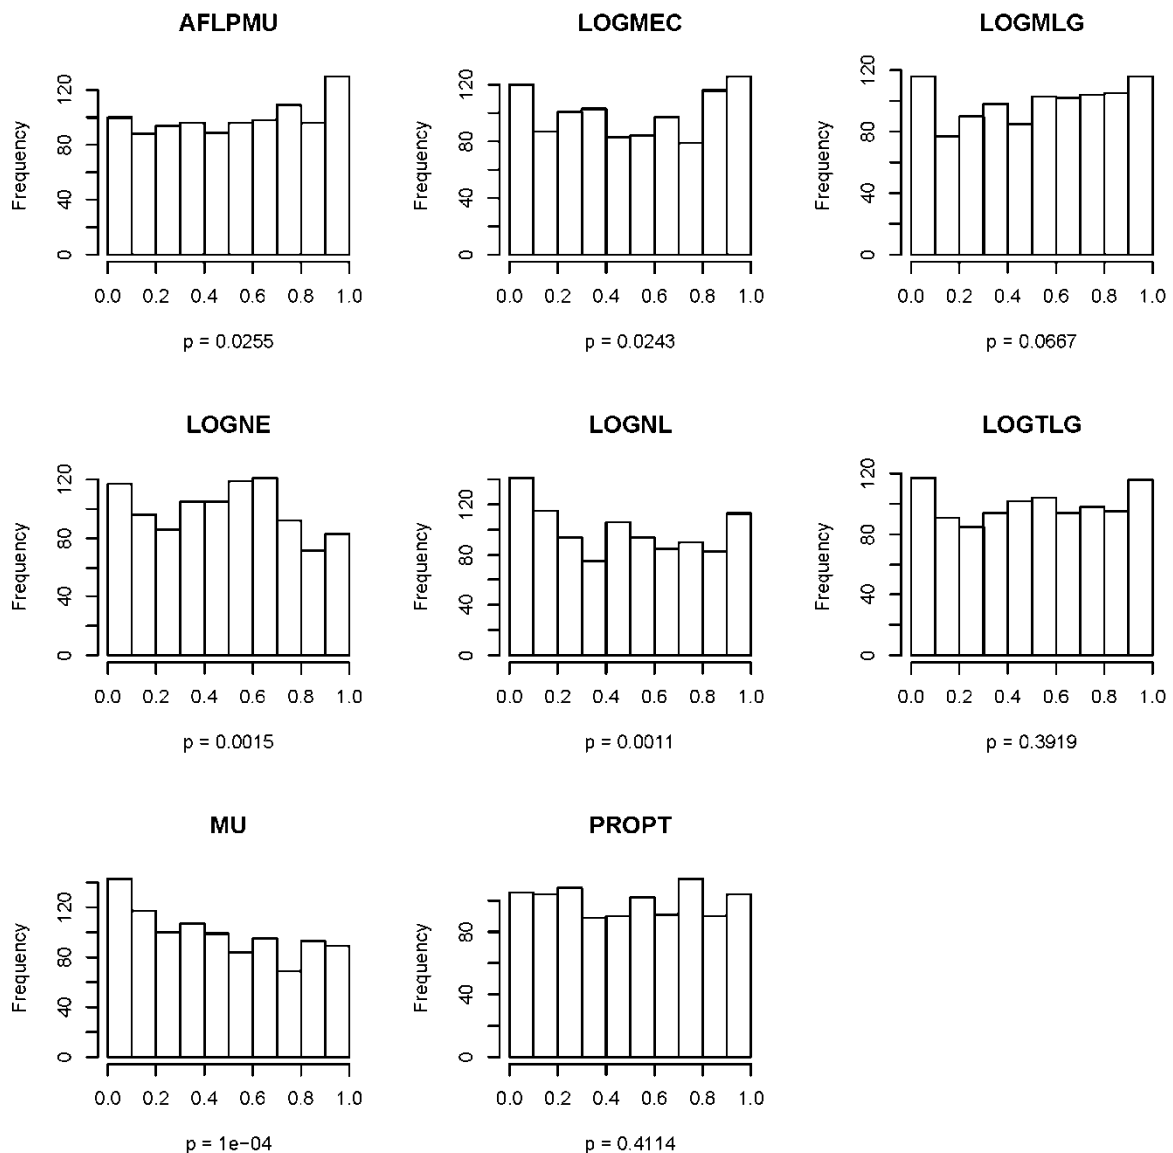

## B. Between-region model

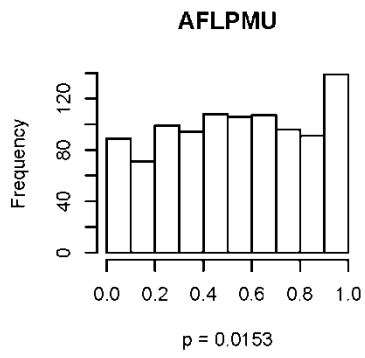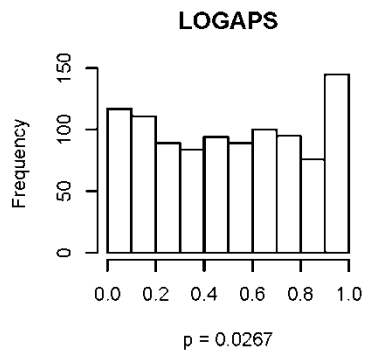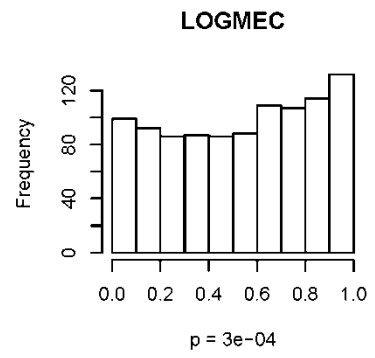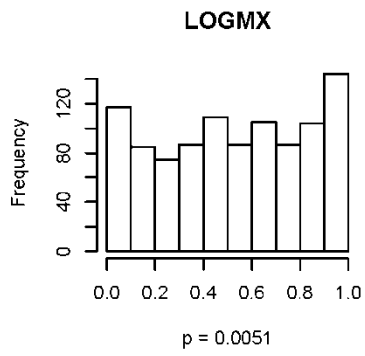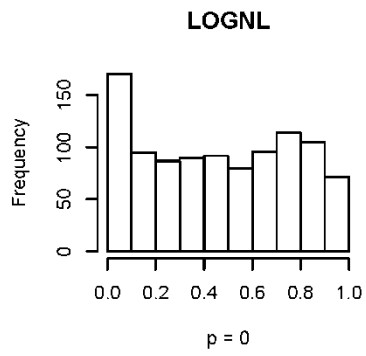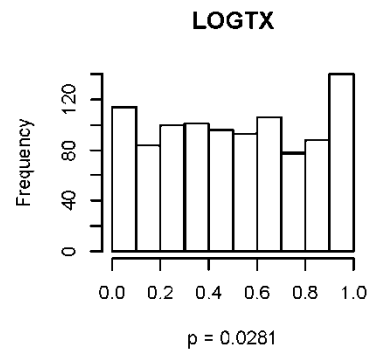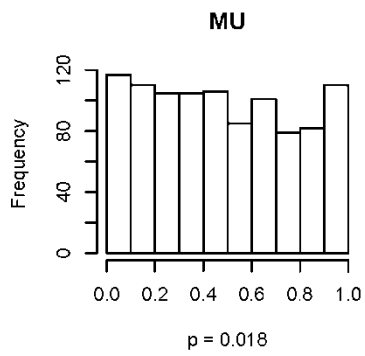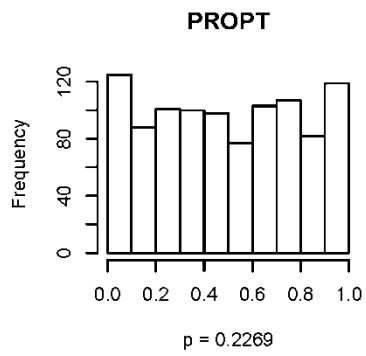

Supplement: evo0068-0935-SD3.pdf [file evo0068-0935-SD3.pdf]
